# Supplementary material
Source: publisher figshare collection journal article supplement (https://acs.figshare.com/ndownloader/files/4322269)
Supplement: Supplementary file 1 [file 4322269]

# Supporting information

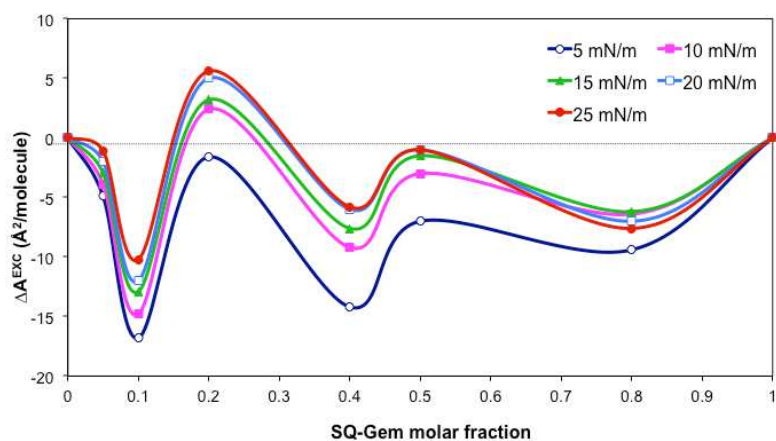

Figure S1 : Excess molecular areas for the DOPC/SQ-Gem monolayers.

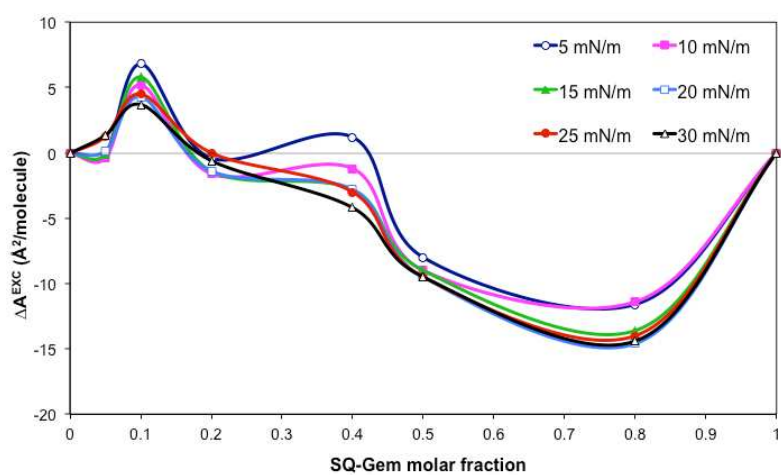

Figure S2 : Excess molecular areas for the DSPC/SQ-Gem monolayers.

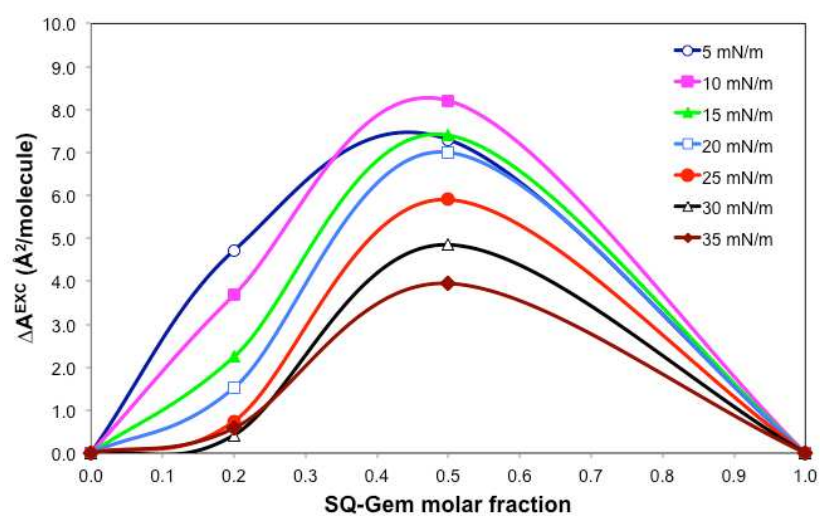

Figure S3 : Excess molecular areas for cholesterol/SQ-Gem mixed monolayers.
